# Supplementary material
Source: PubMed Central journal article supplement (PMC5808578)

Supplementary Figures

Supplementary Figure 1: Full scans of blots shown in the Fig.1c with molecular weight markers indicated. Red boxes indicate the cropped regions.

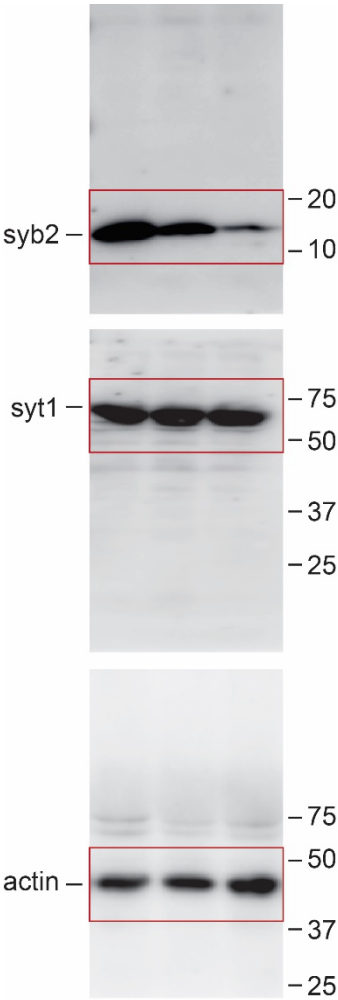

Supplement: NIHMS929903-supplement-supp_figs.pdf [file NIHMS929903-supplement-supp_figs.pdf]
